# Supplementary material
Source: Springer Nature journal article supplement (https://www.springermedizin.de/resource/supplementary/12889_2014_7074_MOESM1_ESM.pdf/9499824)

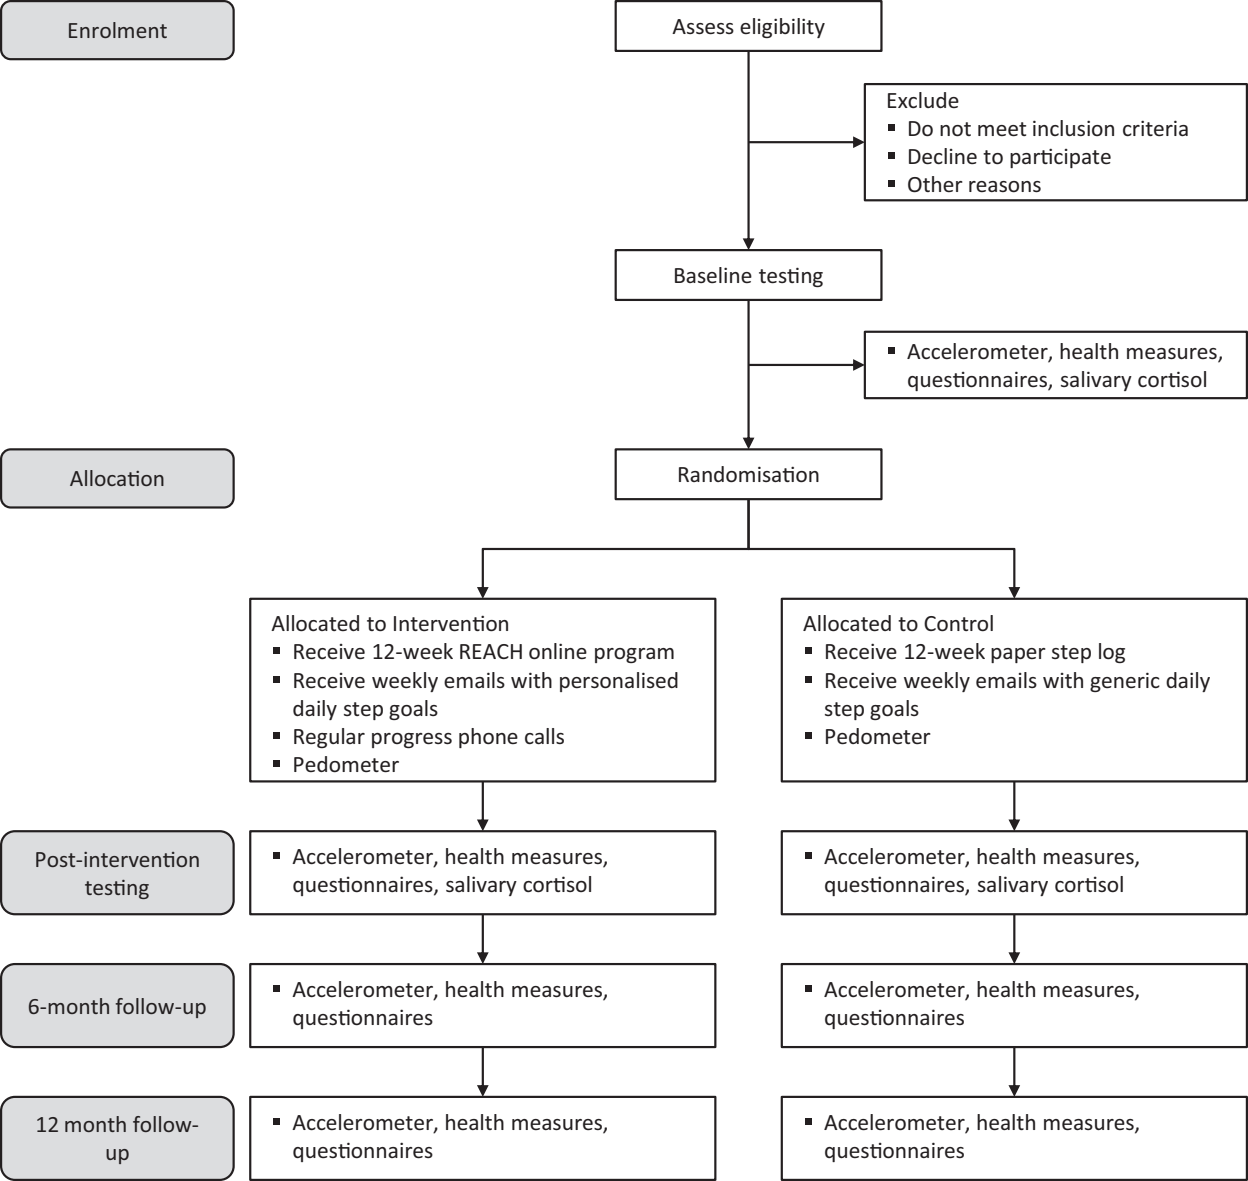

Supplement: MOESM1 [file 9499824]
